# Supplementary material for: Strategic innovation in CuBTC/PANI nanocomposites for dye remediation: a holistic approach for enhancing adsorption, isotherms, and kinetic studies
Source: Royal Society of Chemistry journal article supplement (doi:10.1039/d5su00056d), 2025-01-01
Supplement: d5su00056d1.pdf [file d5su00056d1.pdf]

## **Strategic Innovation in CuBTC/PANI Nanocomposites for Dye Remediation: A Holistic Approach to Enhancing Adsorption, Isotherms, and Kinetic Studies**

Bhavika Garg<sup>a#</sup>, Palkaran Sethi<sup>a#</sup>, and Soumen Basu<sup>a\*</sup>

<sup>a</sup> Department of Chemistry and Biochemistry, Thapar Institute of Engineering & Technology, Patiala-147004, India.

\*Corresponding author E-mail: soumen.basu@thapar.edu

<sup>#</sup>Both the authors have equal contribution

**S1** The nanocomposites were characterized using several characterization techniques. The UV-Vis absorption spectra of the synthesized materials were measured using a Shimadzu UV 2600 UV-Vis spectrophotometer equipment. The morphology and size of the produced composite were examined using field emission scanning electron microscopy (FESEM, JEOL). The functional groups were identified in the materials using Fourier transform infrared (FTIR) spectroscopy, namely with the Shimadzu IRTracer-100 instrument. The Brunauer-Emmett-Teller (BET) and Barrett-Joyner-Halenda (BJH) methods used an autosorb instrument from Belsorp mini II. The X-ray photoelectron spectra (XPS) were acquired using an Omicron ESCA+ spectrometer with Al  $K\alpha$  radiation at 1486.7 eV. The XRD patterns were taken using the Pan Analytical X'Pert-Pro X-ray diffractometer.

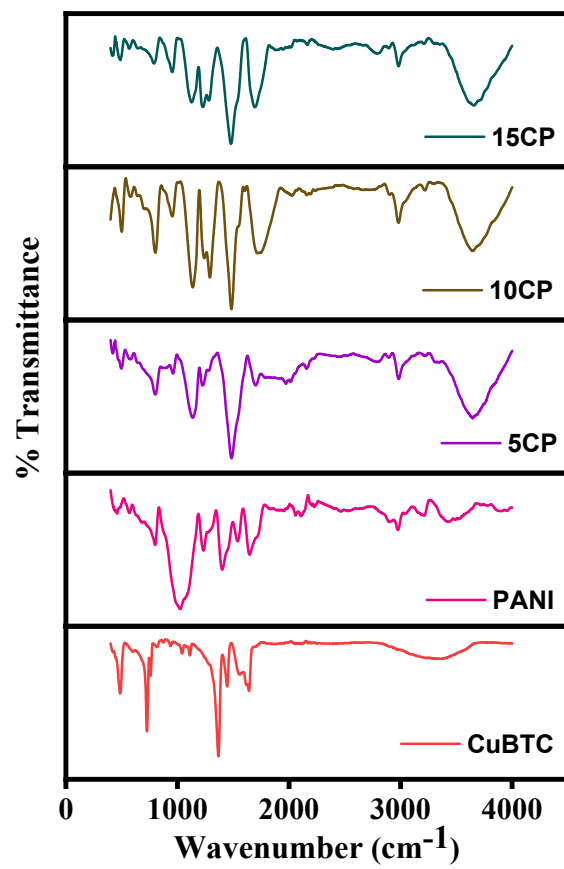

**Figure S1:** FTIR spectra of photocatalysts

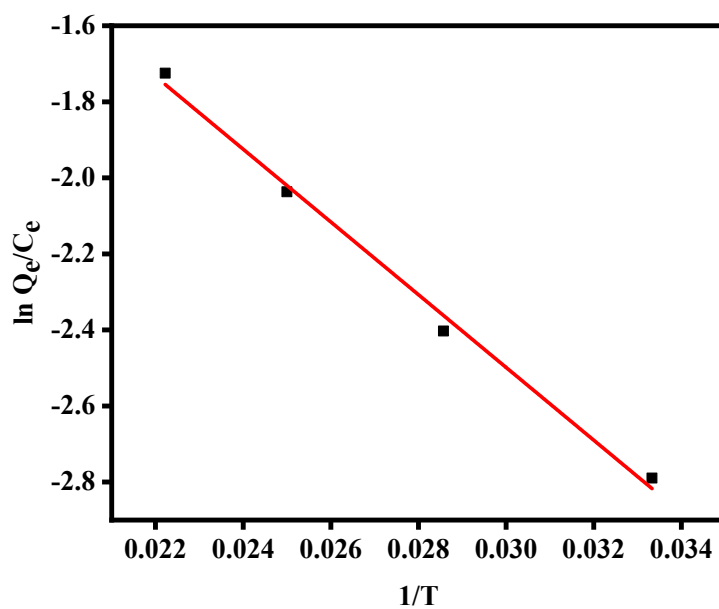

**Figure S2:** Thermodynamic studies

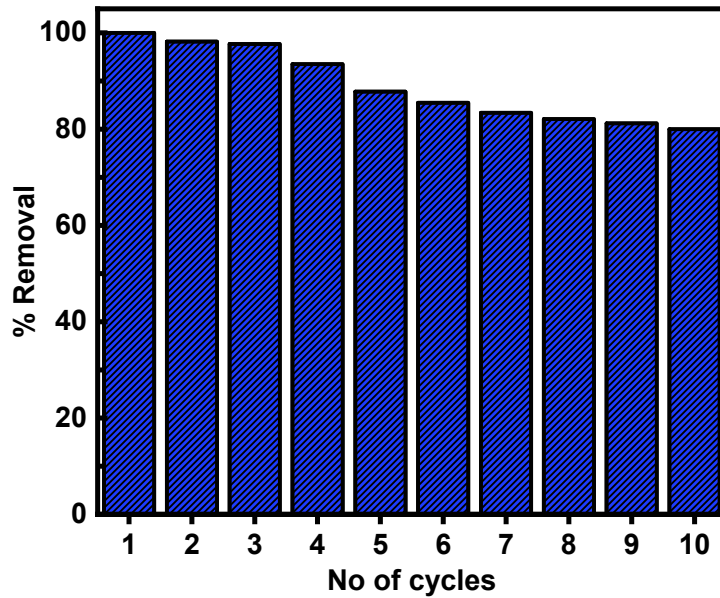

**Figure S3:** Reusability studies

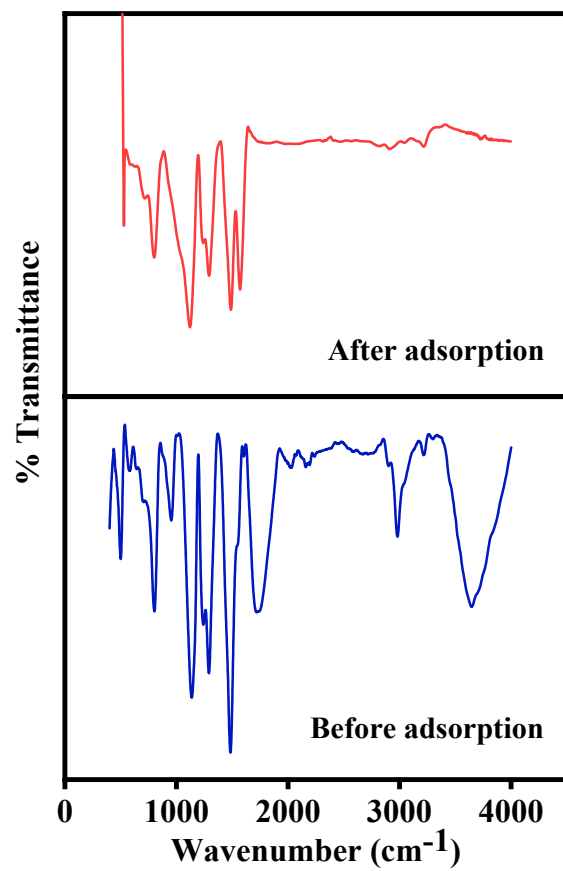

**Figure S4:** FTIR spectra of photocatalyst before and after adsorption of RB19 dye for 6 cycles

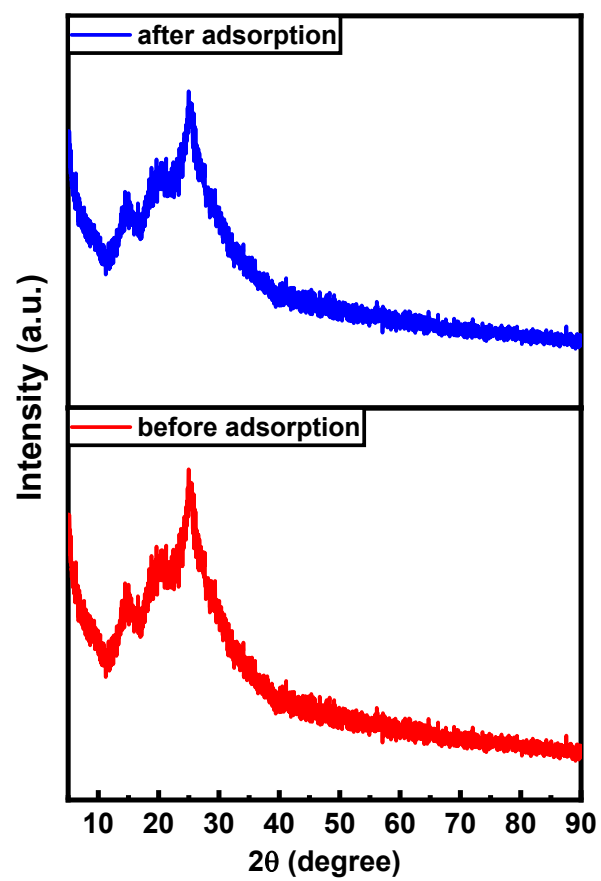

**Figure S5:** XRD spectra of photocatalyst before and after adsorption of RB19 dye for 6 cycles
